# Supplementary material for: Enhanced microwave absorption performance of light weight N-doped carbon nanoparticles
Source: Royal Society of Chemistry journal article supplement (doi:10.1039/d0ra08455g), 2021-01-01
Supplement: d0ra08455g1.pdf [file d0ra08455g1.pdf]

## Enhanced microwave absorption performance of lightweight N-doped carbon nanoparticles

Jianxin Chen<sup>1,2,\*</sup>, Peng Miao<sup>1</sup>, E Emily Lin<sup>2</sup>, Ting Bai<sup>1</sup>, Stoyan K. Smoukov<sup>2</sup> and Jie Kong<sup>1,\*</sup>

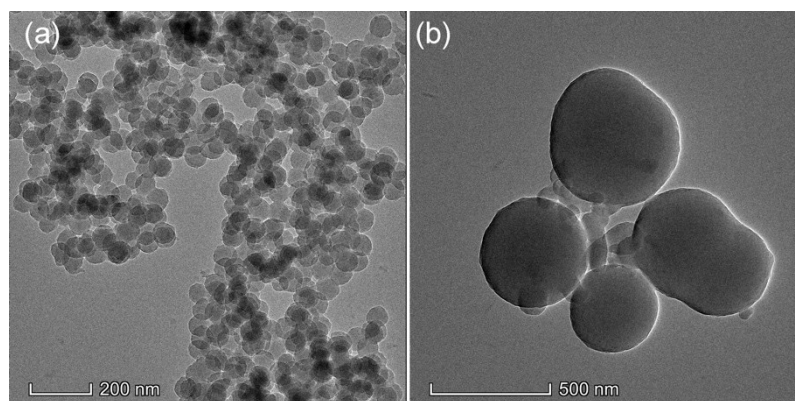

Figure S1 TEM graphs of polydopamine particle. (a) Sphere1, (b) Sphere3

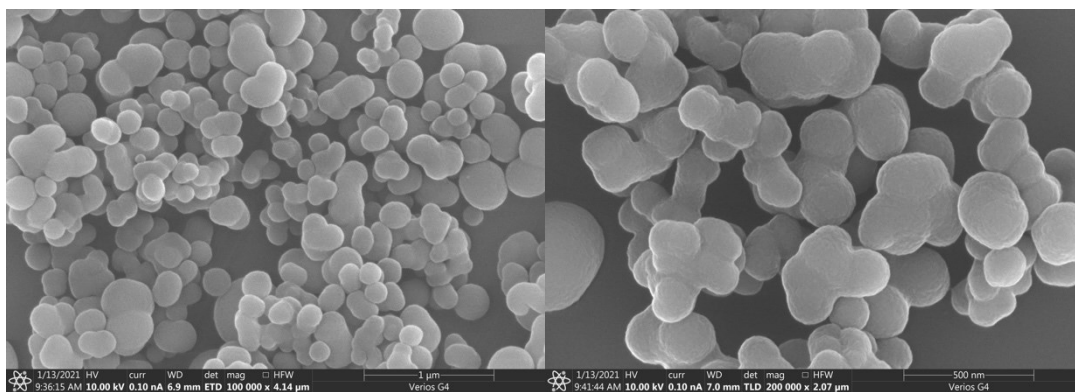

Figure S2 SEM graphs of N-doped carbon capsule.

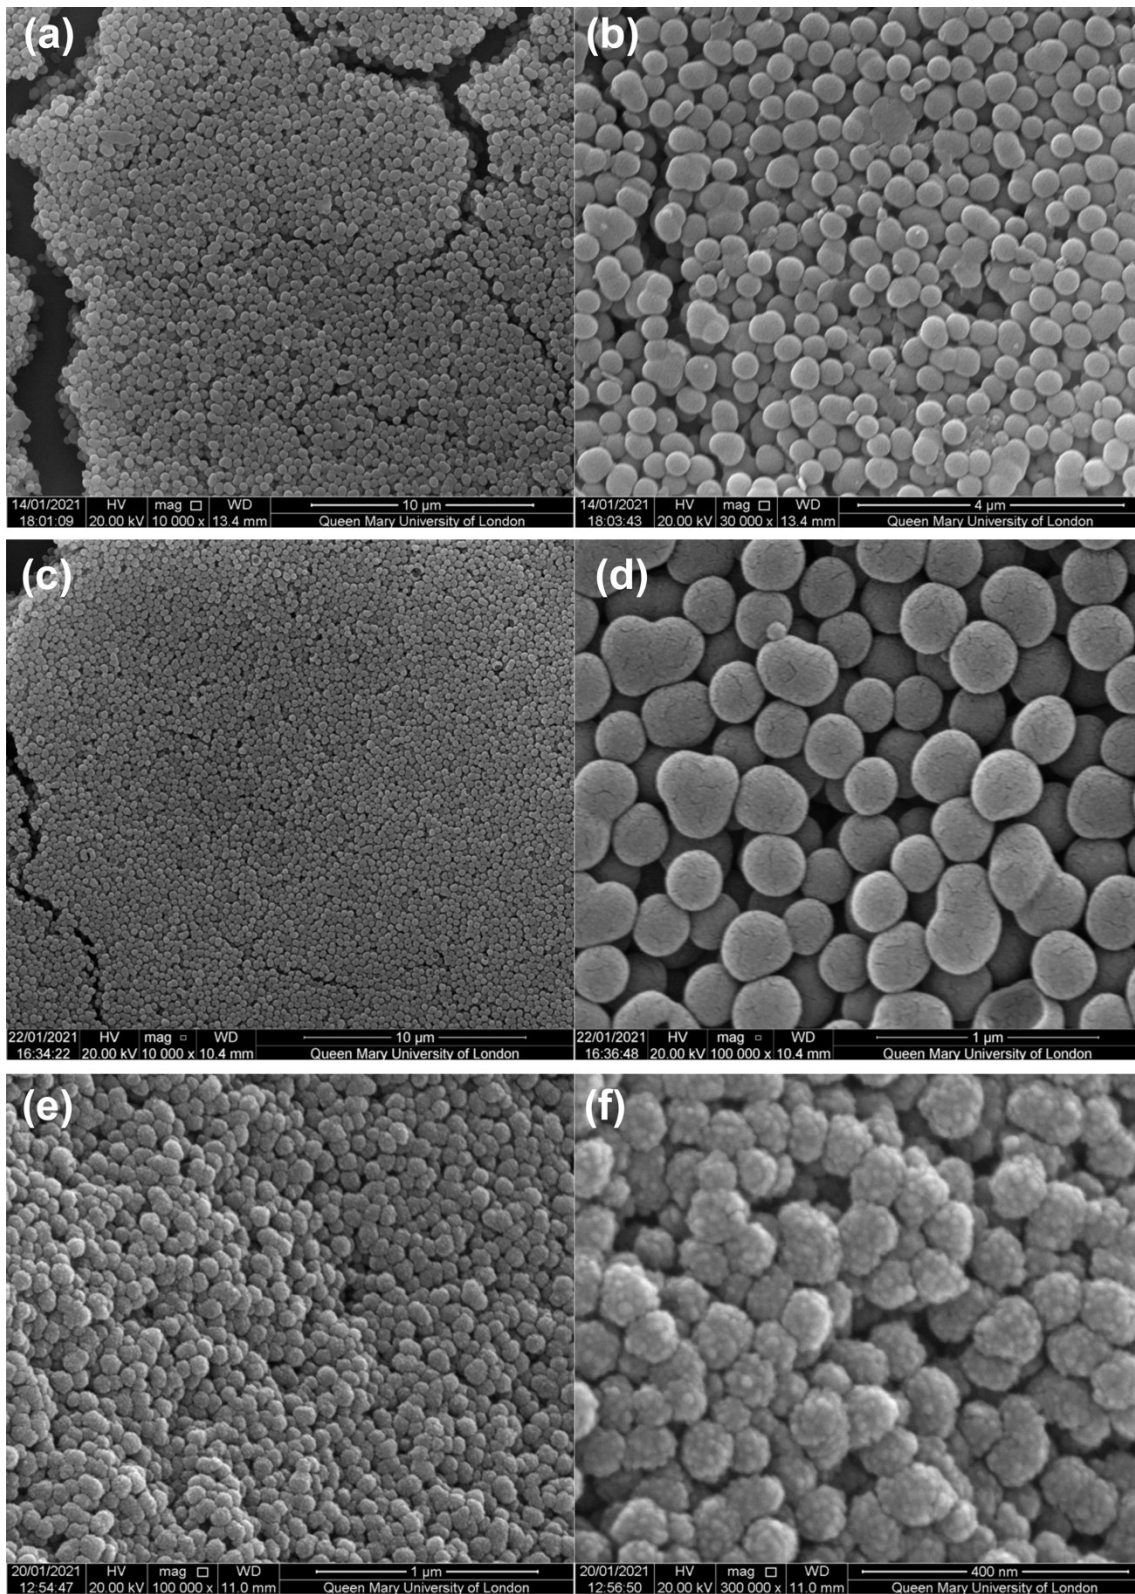

Figure S3 SEM graphs of N-doped carbon particle. (a, b) Sphere3, (c, d) Sphere2 (e, f)

Sphere1

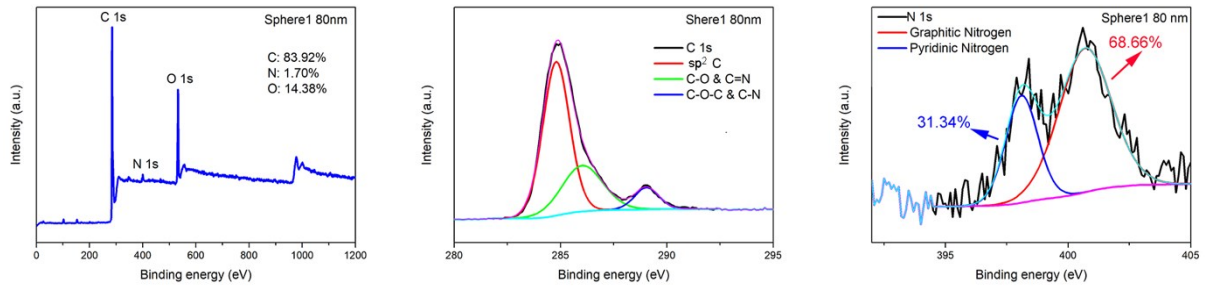

Figure S4 XPS spectrum of N-doped carbon particle (Sphere1).  
(a) survey spectrum, (b) C 1s spectrum

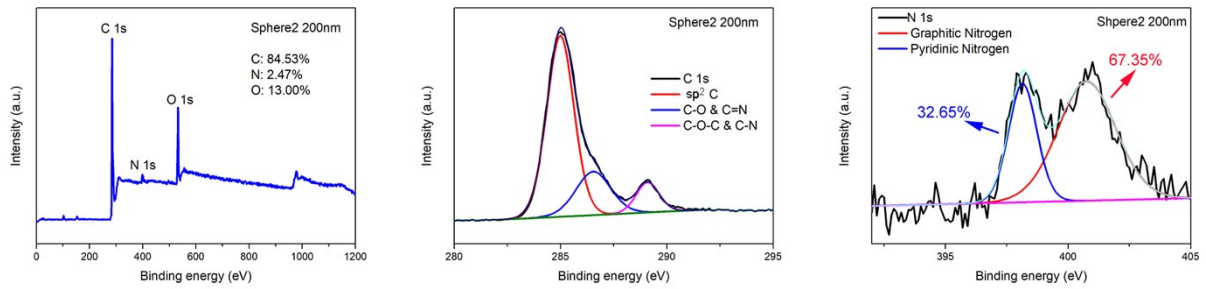

Figure S5 XPS spectrum of N-doped carbon particle (Sphere2).  
(a) survey spectrum, (b) C 1s spectrum

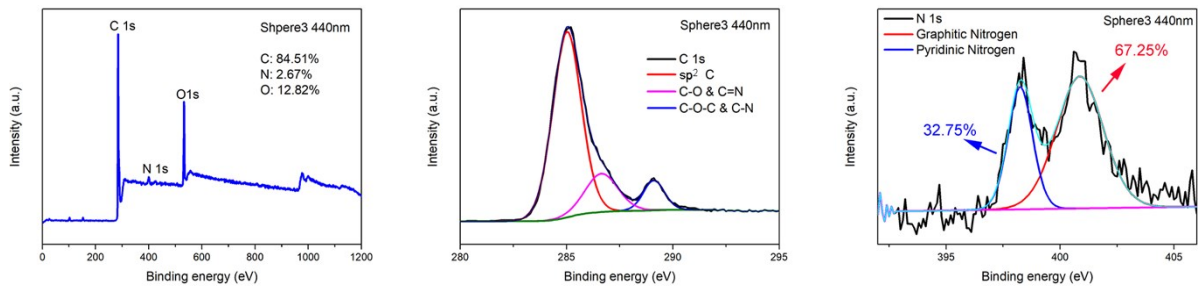

Figure S6 XPS spectrum of N-doped carbon particle (Sphere3).  
(a) survey spectrum, (b) C 1s spectrum

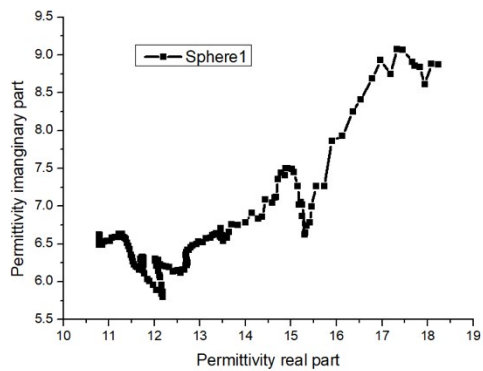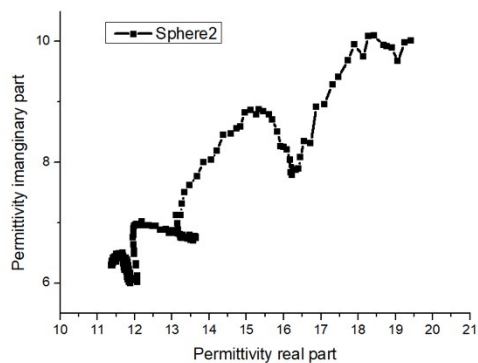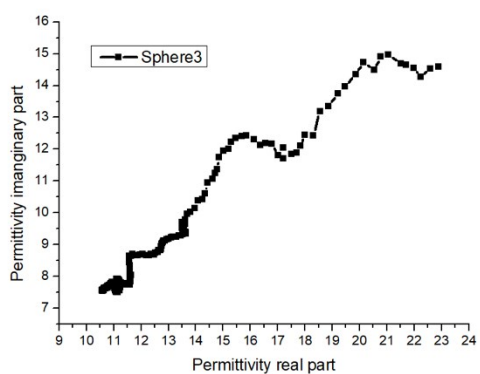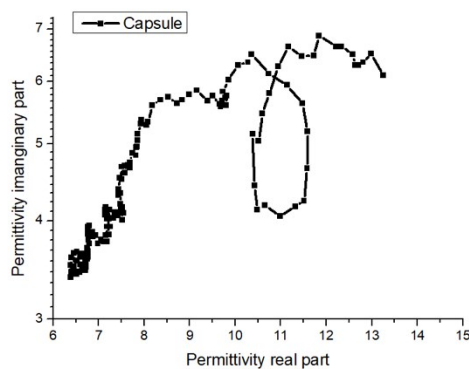

Figure S7 Cole-Cole semicircles of N-doped carbon particles.

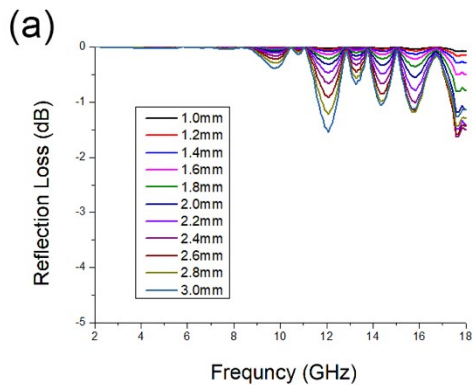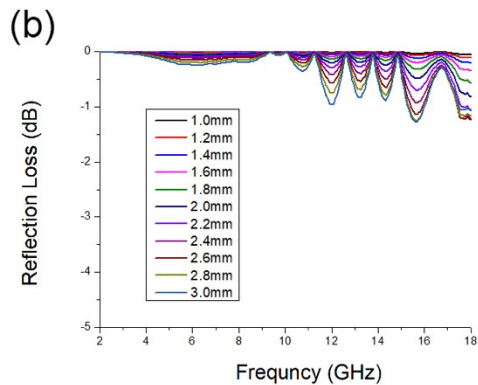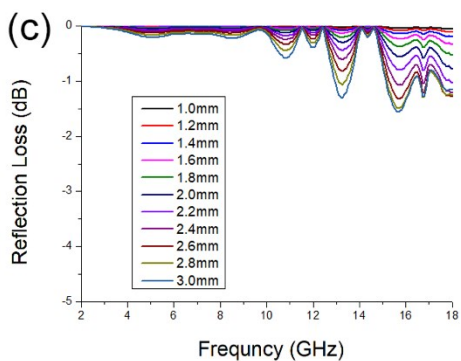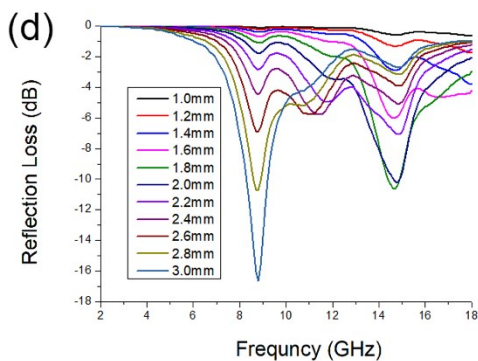

Figure S8 *RL* value of Polydopamine particles, (a) Sphere1, (b) Sphere2 (c) Sphere3 and (d) capsule.

**Table S1** Elementary compositions of N-doped carbon spheres and capsules.

|                | <b>Size</b> | <b>O(at%)</b> | <b>C(at%)</b> | <b>N(at%)</b> | <b>pyridinic N</b> |
|----------------|-------------|---------------|---------------|---------------|--------------------|
| <b>Capsule</b> | 200-300nm   | 15.48         | 81.90         | 2.62          | 35.85%             |
| <b>Sphere1</b> | 80 nm       | 14.38         | 83.92         | 1.70          | 31.34%             |
| <b>Sphere2</b> | 200nm       | 13.00         | 84.53         | 2.47          | 34.67%             |
| <b>Sphere3</b> | 440nm       | 12.82         | 84.51         | 2.67          | 32.75%             |
